# Supplementary material for: MOF-Derived CoSe2@NiFeOOH Arrays for Efficient Oxygen Evolution Reaction
Source: MDPI journal article supplement (doi:10.3390/nano13192621), 2023-09-22
Supplement: s1 [file s1]

# MOF-derived CoSe<sub>2</sub>@NiFeOOH arrays for efficient oxygen evolution reaction

Yulong Tang,<sup>1,2#</sup> Jiangning Li,<sup>1,2#</sup> Zhiyi Lu,<sup>2,3</sup> Yunan Wang,<sup>2,3\*</sup> Kai Tao,<sup>1\*</sup> Yichao Lin<sup>2,3\*</sup>

<sup>1</sup>School of Materials Science & Chemical Engineering, Ningbo University, Ningbo, Zhejiang 315211, P. R. China.

<sup>2</sup>Ningbo Institute of Materials Technology and Engineering, Chinese Academy of Sciences, Ningbo, Zhejiang 315201, P. R. China

<sup>3</sup> University of Chinese Academy of Sciences, Beijing 100049, P.R. China

#These authors contribute equally

E-mails: yclin@nimte.ac.cn, wangyunan@nimte.ac.cn, taokai@nbu.edu.cn

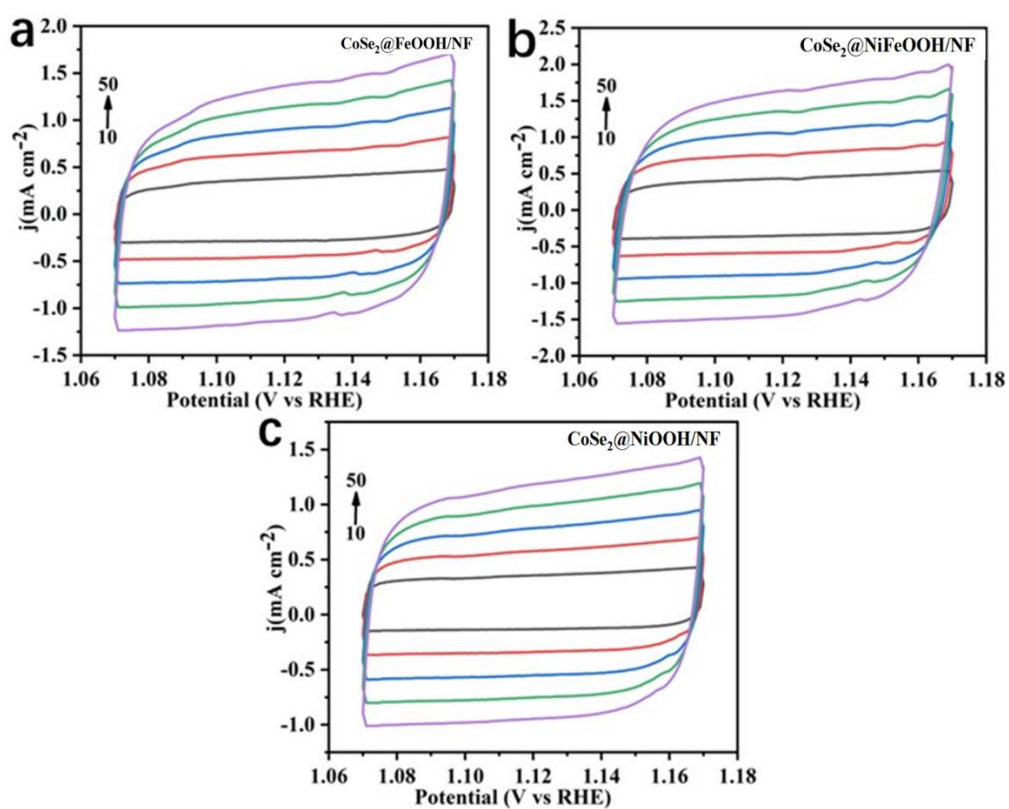

**Figure S1.** CV curves of a)  $\text{CoSe}_2@\text{FeOOH}/\text{NF}$ , b)  $\text{CoSe}_2@\text{NiFeOOH}/\text{NF}$  and c)  $\text{CoSe}_2@\text{NiOOH}/\text{NF}$ .

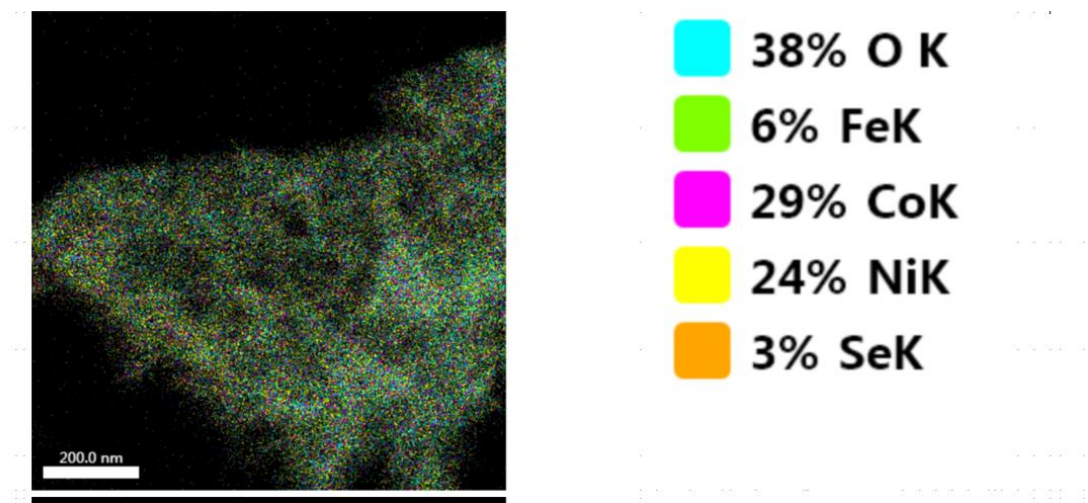

**Figure S2.** Elemental mapping images of Co, O, Fe, Ni and Se.

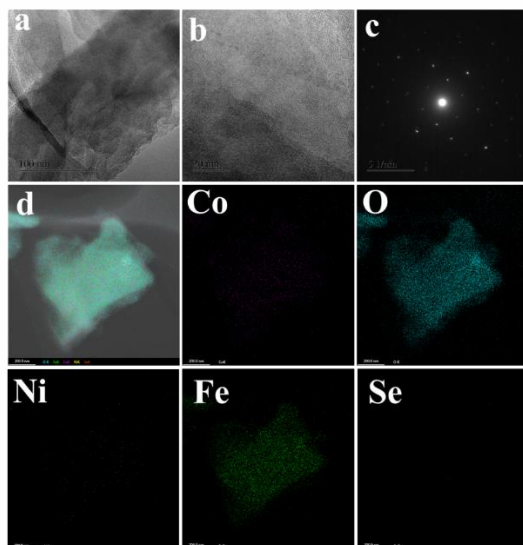

**Figure S3.** (a) TEM, (b) HRTEM, (c) SAED pattern, and (d) STEM images and the corresponding elemental mapping images of Co, O, Fe, Ni and Se of CoSe<sub>2</sub>@NiFeOOH/NF after 100 h durability test.

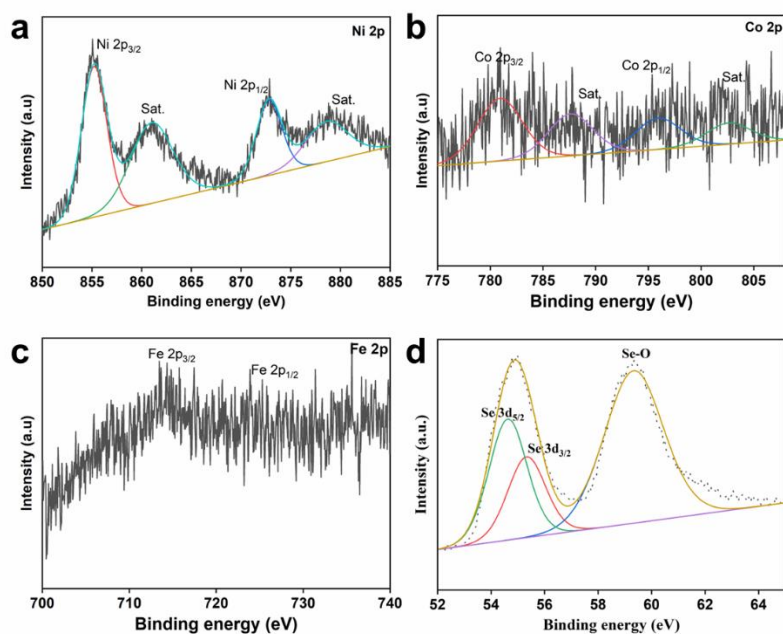

**Figure S4.** High-resolution XPS spectra of CoSe<sub>2</sub>@NiFeOOH/NF after 100 h durability test.

**Table S1.** Comparison of the OER activity of CoSe<sub>2</sub>@NiFeOOH/NF with other non-noble metal electrocatalysts in alkaline solution.

| Electrocatalyst                               | j (mA·cm <sup>-2</sup> ) | η(mV) | b (mV·dec <sup>-1</sup> ) | Electrolyte solution | Ref.      |
|-----------------------------------------------|--------------------------|-------|---------------------------|----------------------|-----------|
| CoSe <sub>2</sub> @ NiFeOOH/NF                | 100                      | 254   | 73                        | 1M KOH               | This work |
| NiFe-LDH/NiCo <sub>2</sub> O <sub>4</sub> /NF | 50                       | 350   | 53                        | 1M KOH               | [1]       |
| NiCo <sub>2</sub> S <sub>4</sub> @NiFe-LDH/NF | 60                       | 201   | 46.3                      | 1M KOH               | [2]       |
| NiFe:Pi/NiFe-LDH/CFP                          | 10                       | 290   | 38                        | 1M KOH               | [3]       |
| CoSe/NiFe-LDH/                                | 150                      | 270   | 57                        | 1M KOH               | [3]       |
| NiFe LDH                                      | 10                       | 300   | 40                        | 1M KOH               | [4]       |
| NiFe LDH/RGO                                  | 10                       | 245   | N/A                       | 1M KOH               | [5]       |
| Ni-Fe LDH/3D-ErGO                             | 10                       | 259   | 39                        | 1M KOH               | [6]       |
| NiFe-LDH                                      | 10                       | 290   | 51                        | 1M KOH               | [7]       |
| NiFeCo LDH/CF                                 | 10                       | 249   | 42                        | 1M KOH               | [8]       |
| Co <sub>3</sub> O <sub>4</sub> @NiFe-LDH      | 10                       | 215   | 40.4                      | 1M KOH               | [9]       |
| Mo-Ni <sub>2</sub> P/NiFe LDH/NF              | 40                       | 269   | 44                        | 1M KOH               | [10]      |
| CoSe <sub>2</sub>                             | 10                       | 284   | 46.3                      | 1M KOH               | [11]      |
| CoSe <sub>2</sub> -450                        | 10                       | 330   | 79                        | 1M KOH               | [12]      |
| Co <sub>2</sub> P/CoSe <sub>2</sub> -300      | 100                      | 280   | 51.2                      | 1M KOH               | [13]      |
| CoSe/Ti                                       | 10                       | 292   | 69                        | 1M KOH               | [14]      |
| NiSe <sub>2</sub> -CoSe <sub>2</sub>          | 10                       | 250   | 49.3                      | 1M KOH               | [15]      |
| SiO <sub>2</sub> /Co <sub>x</sub> P           | 10                       | 293   | 120                       | 1M KOH               | [16]      |
| Ni(OH) <sub>2</sub> @NiS <sub>2</sub>         | 100                      | 359   | 51.7                      | 1M KOH               | [17]      |

## References

1. Wang, Z.; Zeng, S.; Liu, W.; Wang, X.; Li, Q.; Zhao, Z.; Geng, F. Coupling molecularly ultrathin sheets of NiFe-layered double hydroxide on NiCo<sub>2</sub>O<sub>4</sub> nanowire arrays for highly efficient overall water-splitting activity. *ACS Appl. Mater. Interfaces* **2017**, *9*, 1488-1495.
2. Liu, J.; Wang, J.; Zhang, B.; Ruan, Y.; Lv, L.; Ji, X.; Xu, K.; Miao, L.; Jiang, J. Hierarchical NiCo<sub>2</sub>S<sub>4</sub>@NiFe LDH heterostructures supported on nickel foam for enhanced overall-water-splitting activity. *ACS Appl. Mater. Interfaces* **2017**, *9*, 15364-15372.
3. Wang, Y.; Yan, D.; El Hankari, S.; Zou, Y.; Wang, S. Recent progress on layered double hydroxides and their derivatives for electrocatalytic water splitting. *Adv. Sci.* **2018**, *5* 1800064.
4. Song, F.; Hu, X. Exfoliation of layered double hydroxides for enhanced oxygen evolution catalysis. *Nat. Commun.* **2014**, *5*, 4477.
5. Youn, D. H.; Park, Y. B.; Kim, J. Y.; Magesh, G.; Jang, Y. J.; Lee, J. S. One-pot synthesis of NiFe layered double hydroxide/reduced graphene oxide composite as an efficient electrocatalyst for electrochemical and photoelectrochemical water oxidation. *J. Power Sources* **2015**, *294*, 437-443.
6. Yu, X.; Zhang, M.; Yuan, W.; Shi, G. A high-performance three-dimensional Ni-Fe layered double hydroxide/graphene electrode for water oxidation. *J. Mater. Chem. A* **2015**, *3*, 6921-6928.
7. Zhong, H.; Liu, T.; Zhang, S.; Li, D.; Tang, P.; Alonso-Vante, N.; Feng, Y. Template-free synthesis of three-dimensional NiFe-LDH hollow microsphere with enhanced OER performance in alkaline media. *J. Electrochem. Soc.* **2019**, *33*, 130-137.
8. Lin, Y.; Wang, H.; Peng, C. K.; Bu, L.; Chiang, C. L.; Tian, K.; Zhao, Y.; Zhao, J.; Lin, Y. G.; Lee, J. M.; Gao, L. Co-induced electronic optimization of hierarchical NiFe LDH for oxygen evolution. *Small*. **2020**, *16*, e2002426.
9. Meng, L.; Xuan, H.; wang, J.; Liang, X.; Li, Y.; Yang, J.; Han, P. Flower-like Co<sub>3</sub>O<sub>4</sub>@NiFe-LDH nanosheets enable high-performance bifunctionality towards both electrocatalytic HER and OER in alkaline solution. *J. Alloys Compd.* **2022**, *919*, 165877.
10. Yang, Z.; Lin, Y.; Jiao, F.; Li, J.; Wang, J.; Gong, Y. In situ growth of 3D walnut-like nano-architecture Mo-Ni<sub>2</sub>P@NiFe LDH/NF arrays for synergistically enhanced overall water splitting. *J. Energy Chem.* **2020**, *49*, 189-197.
11. Zhang, Y.; Zhang, C.; Guo, Y.; Liu, D.; Yu, Y.; Zhang, B. Selenium vacancy-rich CoSe<sub>2</sub> ultrathin nanomeshes with abundant active sites for electrocatalytic oxygen evolution. *J. Mater. Chem. A* **2019**, *7*, 2536-2540.
12. Liu, X.; Liu, Y.; Fan, L.-Z. MOF-derived CoSe<sub>2</sub> microspheres with hollow interiors as high-performance electrocatalysts for the enhanced oxygen evolution reaction. *J. Mater. Chem. A* **2017**, *5*, 15310-15314.
13. Du, X.; Li, J.; Tong, K.; Zhang, X. Coupling Co<sub>2</sub>P/CoSe<sub>2</sub> heterostructure nanoarrays for boosting overall water splitting. *Dalton Trans.* **2021**, *50*, 6650-6658.
14. Liu, T.; Liu, Q.; Asiri, A. M.; Luo, Y.; Sun, X. An amorphous CoSe<sub>2</sub> film behaves as an active and stable full water-splitting electrocatalyst under strongly alkaline conditions. *Chem. Commun.* **2015**, *51*, 16683.
15. Li, M.; Feng, L.G.; NiSe<sub>2</sub>-CoSe<sub>2</sub> with a hybrid nanorods and nanoparticles structure for efficient oxygen evolution reaction. *Chinese J. Struc. Chem.* **2022**, *41*, 2201019-2201024.
16. Zeng, X.; Zhang, H.; Zhang, X.; Zhang, Q.; Chen, Y.; Yu, R.; Moskovits, M., Coupling of ultrasmall and small Co P nanoparticles confined in porous SiO<sub>2</sub> matrix for a robust oxygen evolution reaction. *Nano Materials Science* **2022**, *4*, 393-399.
17. Xu, S.J.; Zhou, Y.N.; Shen, G.P.; Dong, B.; Ni(OH)<sub>2</sub> derived from NiS<sub>2</sub> induced by reflux playing three roles for hydrogen/oxygen evolution reaction. *Chinese J. Struc. Chem.* **2022**, *41*, 2208052-2208057.
